# Supplementary material for: Exogenous melatonin improves salt stress adaptation of cotton seedlings by regulating active oxygen metabolism
Source: PeerJ. 2020 Dec 11;8:e10486. doi: 10.7717/peerj.10486 (PMC7735075; doi:10.7717/peerj.10486)
Supplement: Supplemental Information 1 [file peerj-08-10486-s001.xlsx]

## Sheet: plant height
	days after treatment /d		different concentration of melatonin
	0	Repetitions	CK	S	S+MT50	S+MT100	S+MT200	S+MT500
		1	7.4	7.5	7.9	7.7	7.9	8.1
		2	7.7	7.5	8.2	8.5	7.5	7.6
		3	7.8	8.5	7.5	7.5	8.2	7.6
		4	8.1	7.5	7.5	7.5	7.5	7.9
		5	7.9	8.1	7.9	7.5	7.9	8.1
		6	8.1	7.7	8.2	8.1	8.2	7.5
		AVE	7.83333	7.8	7.86667	7.8	7.86667	7.8
		SD	0.24267	0.378594	0.286744	0.378594	0.286744	0.244949
	3	Repetitions	CK	S	S+MT50	S+MT100	S+MT200	S+MT500
		1	9.5	9.3	6.6	9.3	9.6	9
		2	9.5	9.2	9.6	10.6	9.6	8.3
		3	9.2	8.6	9.5	7.7	10.5	9.2
		4	10	8.6	10.5	7.5	10	10.3
		5	8.5	7	8.3	11.2	9.5	9.5
		6	12.5	6.9	9.6	10.5	10	10.2
		AVE	9.86667	8.26667	9.01667	9.46667	9.86667	9.41667
		SD	1.26051	0.968963	1.25621	1.43604	0.344803	0.691416
	6	Repetitions	CK	S	S+MT50	S+MT100	S+MT200	S+MT500
		1	10.9	8.7	8.3	11.2	10.8	9.5
		2	10.8	9.8	10.3	11.2	10.9	10.5
		3	12.4	8.7	10.9	9.6	10.7	9.7
		4	12.7	9.8	9.7	11.2	10.8	10.8
		5	12.8	8.6	10.2	10.2	11.3	11.9
		6	11.9	9.1	9.8	10.7	11.8	10.5
		AVE	11.9167	9.11667	9.86667	10.6833	11.05	10.4833
		SD	0.807087	0.507992	0.801388	0.606676	0.386221	0.784042
	9	Repetitions	CK	S	S+MT50	S+MT100	S+MT200	S+MT500
		1	12.3	11.3	12.5	13.3	11.4	11.1
		2	13.6	9.9	9.3	11.3	13.5	11.4
		3	14	10.3	13.4	11.4	11.2	12.1
		4	11.3	9.2	9.4	11.7	11.6	12.4
		5	12.7	10.4	12.8	11.4	13.1	10.6
		6	15.2	10.2	10.9	12.6	12.4	13.2
		AVE	13.1833	10.2167	11.3833	11.95	12.2	11.8
		SD	1.25621	0.625611	1.62421	0.745542	0.869866	0.866025
	12	Repetitions	CK	S	S+MT50	S+MT100	S+MT200	S+MT500
		1	14.2	11	13.5	12.5	14.3	13.5
		2	15.8	10	12.5	14.5	14.5	12.5
		3	17	13	11.2	15.4	14	14.6
		4	16.5	11.2	12.6	13.5	14.5	13.9
		5	14.5	11.5	13.8	13.2	15.3	14.1
		6	14.3	12.5	11.8	13.9	14.2	13.7
		AVE	15.3833	11.5333	12.5667	13.8333	14.4667	13.7167
		SD	1.10968	0.986013	0.899383	0.930352	0.410961	0.643989
	Explanation：This figure is the raw data of plant height determination. We set up six repetitions in each experiment to ensure the reliability of the results, and finally take the average as the final result.

## Sheet: leaf area
	days after treatment /d		different concentration of melatonin
	0	Repetitions	CK	S	S+MT50	S+MT100	S+MT200	S+MT500
		1	50.9775	52.56	54.3975	69.63	50.125	55.875
		2	54.015	64.7075	60.525	43.1625	65.175	65.625
		3	49.8075	50.5125	56.9625	52.8525	51.91	62.6025
		4	76.2675	60.4125	59.6025	62.92	61.3875	46.14
		AVE	57.7669	57.0481	57.8719	57.1412	57.1494	57.5606
		SD	10.7912	5.76287	2.39439	10.0394	6.30804	7.47875
	3	Repetitions	CK	S	S+MT50	S+MT100	S+MT200	S+MT500
		1	100.987	66.655	80.625	94.7075	94.775	89.5125
		2	86.4375	75.7875	91.2	82.8875	97.4875	81.375
		3	92.925	71.0875	93.5325	97.455	85.575	80.775
		4	99.3827	75.0625	75.335	84.6125	96.78	84.85
		AVE	94.9331	72.1481	85.1731	89.9156	93.6544	84.1281
		SD	5.75883	3.64136	7.47791	6.2714	4.76955	3.4762
	6	Repetitions	CK	S	S+MT50	S+MT100	S+MT200	S+MT500
		1	128.035	80.31	91.2975	102.903	110.895	88.72
		2	115.928	99.345	83.415	104.582	112.645	110.332
		3	132.39	89.7625	102.44	119.875	132.18	88.3425
		4	119.007	83.735	105.502	112.382	128.93	103.835
		AVE	123.84	88.2881	95.6638	109.936	121.163	97.8075
		SD	6.6457	7.22512	8.82914	6.76201	9.48273	9.5574
	9	Repetitions	CK	S	S+MT50	S+MT100	S+MT200	S+MT500
		1	150.445	99.68	124.64	138.5	140.218	139.488
		2	148.688	122.64	116.87	121.41	142.225	113.897
		3	147.78	109.38	107.89	139.352	156.075	116.603
		4	152.1	112.353	126.927	145.265	144.225	120.888
		AVE	149.753	111.013	119.082	136.132	145.686	122.719
		SD	1.65946	8.18665	7.45984	8.88999	6.16338	9.99709
	12	Repetitions	CK	S	S+MT50	S+MT100	S+MT200	S+MT500
		1	187.725	140.507	147.445	157.52	182.54	161.375
		2	185.475	149.74	140.735	178.588	179.825	161.453
		3	174.482	133.51	165.825	161.812	173.662	148.188
		4	189.3	129.882	159.73	170.562	177.26	146.755
		AVE	184.246	138.41	153.434	167.121	178.322	154.442
		SD	5.79833	7.57457	9.87812	8.11917	3.2745	6.98968
	Explanation：This figure is the raw data of leaf areas determination. We set up four repetitions in each experiment to ensure the reliability of the results, and finally take the average as the final result.

## Sheet: H2O2
	days after treatment /d		different concentration of melatonin
	0	Repetitions	CK	S	S+MT50	S+MT100	S+MT200	S+MT500
		1	11.257	11.6599	17.1255	16.5897	16.9588	14.2549
		2	16.3255	15.9655	11.5683	12.2548	14.2587	17.2365
		3	15.3699	16.6548	14.6588	13.8957	12.5112	12.0479
		AVE	14.3174	14.7601	14.4508	14.2467	14.5762	14.5131
		SD	2.19895	2.21013	2.27348	1.787	1.82953	2.1261
	3	Repetitions	CK	S	S+MT50	S+MT100	S+MT200	S+MT500
		1	19.4854	30.1237	28.3699	24.3652	20.9635	24.9969
		2	24.8594	35.1699	33.2563	30.259	26.2587	28.2548
		3	20.2597	36.8575	32.2575	27.6987	23.5988	31.8856
		AVE	21.5348	34.0503	31.2946	27.441	23.607	28.3791
		SD	2.37199	2.86079	2.1079	2.41299	2.16177	2.81371
	6	Repetitions	CK	S	S+MT50	S+MT100	S+MT200	S+MT500
		1	18.2546	30.1525	26.259	22.2585	18.8564	24.2587
		2	22.2591	28.2555	28.1237	24.1269	23.9865	25.4786
		3	23.2585	26.9659	25.2548	24.2538	22.5631	23.0987
		AVE	21.2574	28.458	26.5458	23.5464	21.802	24.2786
		SD	2.16212	1.30877	1.18862	0.912145	2.16241	0.97171
	9	Repetitions	CK	S	S+MT50	S+MT100	S+MT200	S+MT500
		1	13.9633	21.6582	18.2587	17.5865	13.9658	16.237
		2	16.9987	23.9986	21.9655	16.259	17.3547	19.9633
		3	14.9659	20.9875	20.8547	17.6969	16.6654	16.2465
		AVE	15.3093	22.2148	20.3596	17.1808	15.9953	17.4822
		SD	1.26277	1.29073	1.55327	0.653368	1.4624	1.75435
	12	Repetitions	CK	S	S+MT50	S+MT100	S+MT200	S+MT500
		1	12.0963	19.2586	15.8965	13.8546	12.9986	14.8564
		2	14.5969	19.9655	18.9615	16.2548	15.4694	16.6585
		3	15.5659	18.7536	18.3457	16.2479	13.9466	15.5215
		AVE	14.0863	19.3259	17.7346	15.4524	14.1382	15.6788
		SD	1.46175	0.49701	1.32378	1.12982	1.01776	0.744048
	Explanation：This figure is the raw data of H2O2 determination. We set up three repetitions in each experiment to ensure the reliability of the results, and finally take the average as the final result.

## Sheet: O2-
	days after treatment /d		different concentration of melatonin
	0	Repetitions	CK	S	S+MT50	S+MT100	S+MT200	S+MT500
		1	149.132	148.37	148.479	150.965	159.365	157.847
		2	155.586	156.49	159.247	168.548	164.259	164.37
		3	150.285	160.258	156.846	147.255	149.659	148.365
		4	163.847	156.255	143.215	145.987	155.965	150.249
		AVE	154.712	155.343	151.947	153.189	157.312	155.207
		SD	5.80823	4.3283	6.43384	9.05416	5.31174	6.37036
	3	Repetitions	CK	S	S+MT50	S+MT100	S+MT200	S+MT500
		1	160.595	233.404	219.52	203.57	165.967	198.942
		2	162.743	248.28	220.843	187.95	175.016	198.198
		3	167.743	227.454	227.123	189.843	179.272	214.297
		4	149.066	230.429	215.446	190.595	167.867	210.734
		AVE	160.037	234.892	220.733	192.989	172.031	205.543
		SD	6.84455	8.01097	4.1915	6.18425	5.37259	7.0906
	6	Repetitions	CK	S	S+MT50	S+MT100	S+MT200	S+MT500
		1	167.95	204.396	204.809	192.098	191.628	198.528
		2	160.925	201.421	201.668	200.264	186.628	176.38
		3	173.9	222.247	198.611	189.685	176.504	199.355
		4	175.801	219.272	200.536	179.933	160.429	197.206
		AVE	169.644	211.834	201.406	190.495	178.797	192.867
		SD	5.80765	9.04872	2.24833	7.2492	11.9224	9.54993
	9	Repetitions	CK	S	S+MT50	S+MT100	S+MT200	S+MT500
		1	153.074	200.677	194.727	165.223	172.33	192.248
		2	159.024	206.628	194.727	177.124	162.33	191.173
		3	162	221.504	200.677	177.124	158.28	175.223
		4	156.049	206.628	194.727	174.148	166.854	185.223
		AVE	157.537	208.859	196.214	173.405	164.949	185.967
		SD	3.32637	7.69393	2.5766	4.87742	5.23064	6.75541
	12	Repetitions	CK	S	S+MT50	S+MT100	S+MT200	S+MT500
		1	144.148	182.826	167.95	169.851	150.099	163.652
		2	141.173	194.727	176.876	152.826	147.124	159.603
		3	144.148	191.752	179.851	161.752	153.074	178.504
		4	143.658	188.776	182.826	165.801	141.173	168.134
		AVE	143.282	189.52	176.876	162.557	147.867	167.473
		SD	1.23384	4.40038	5.56609	6.30606	4.40038	7.04714
	Explanation：This figure is the raw data of O2- determination. We set up four repetitions in each experiment to ensure the reliability of the results, and finally take the average as the final result.

## Sheet: O2- production rate
	days after treatment /d		different concentration of melatonin
	0	Repetitions	CK	S	S+MT50	S+MT100	S+MT200	S+MT500
		1	7.45862	7.42047	7.42592	7.55026	7.97042	7.89445
		2	7.7814	7.82658	7.9645	8.42965	8.21515	8.2207
		3	7.51625	8.01508	7.84442	7.36472	7.48496	7.42023
		4	8.19454	7.81484	7.16266	7.30134	7.80034	7.51445
		AVE	7.7377	7.76924	7.59938	7.66149	7.86772	7.76246
		SD	0.29049	0.216473	0.321778	0.45283	0.265658	0.318603
	3	Repetitions	CK	S	S+MT50	S+MT100	S+MT200	S+MT500
		1	8.03189	11.6734	10.979	10.1812	8.30056	9.94977
		2	8.13936	12.4174	11.0451	9.40002	8.75317	9.91256
		3	8.38943	11.3758	11.3592	9.49468	8.96602	10.7177
		4	7.4553	11.5246	10.7752	9.53229	8.39563	10.5395
		AVE	8.00399	11.7478	11.0396	9.65206	8.60384	10.2799
		SD	0.342319	0.400656	0.209631	0.309296	0.268702	0.354625
	6	Repetitions	CK	S	S+MT50	S+MT100	S+MT200	S+MT500
		1	8.39976	10.2226	10.2432	9.6075	9.58396	9.92909
		2	8.04843	10.0738	10.0861	10.0159	9.33389	8.82135
		3	8.69736	11.1154	9.93321	9.48681	8.82755	9.97042
		4	8.79243	10.9666	10.0295	8.99908	8.02362	9.86295
		AVE	8.48449	10.5946	10.073	9.52732	8.94226	9.64595
		SD	0.290461	0.452558	0.112447	0.362557	0.596282	0.477625
	9	Repetitions	CK	S	S+MT50	S+MT100	S+MT200	S+MT500
		1	7.65576	10.0366	9.73896	8.26336	8.61882	9.61497
		2	7.95336	10.3342	9.73896	8.85856	8.11868	9.56123
		3	8.10216	11.0782	10.0366	8.85856	7.91615	8.7635
		4	7.80456	10.3342	9.73896	8.70976	8.34496	9.26363
		AVE	7.87896	10.4458	9.81336	8.67256	8.24965	9.30083
		SD	0.166363	0.3848	0.128865	0.243937	0.261603	0.337861
	12	Repetitions	CK	S	S+MT50	S+MT100	S+MT200	S+MT500
		1	7.20936	9.14376	8.39976	8.49483	7.50696	8.18482
		2	7.06056	9.73896	8.84616	7.64336	7.35816	7.98229
		3	7.20936	9.59016	8.99496	8.08976	7.65576	8.92758
		4	7.18481	9.44136	9.14376	8.29229	7.06056	8.40898
		AVE	7.16602	9.47856	8.84616	8.13006	7.39536	8.37592
		SD	0.0617085	0.220078	0.278379	0.315388	0.220078	0.352452
	Explanation：This figure is the raw data of O2- production rate determination. We set up four repetitions in each experiment to ensure the reliability of the results, and finally take the average as the final result.

## Sheet: MDA
	days after treatment /d		different concentration of melatonin
	0	Repetitions	CK	S	S+MT50	S+MT100	S+MT200	S+MT500
		1	35.138	32.023	34.796	34.796	36.097	35.869
		2	33.2678	37.947	35.792	35.892	33.852	33.639
		3	31.274	34.7894	32.344	30.096	33.0563	31.047
		4	32.456	32.968	35.828	35.046	34.257	32.73
		5	34.975	33.454	34.835	32.456	34.626	34.826
		AVE	33.4222	34.2363	34.719	33.6572	34.3777	33.6222
		SD	1.47833	2.05886	1.26817	2.114	1.00545	1.66884
	3	Repetitions	CK	S	S+MT50	S+MT100	S+MT200	S+MT500
		1	36.284	42.444	42.252	40.768	35.54	37.768
		2	32.672	44.54	43.928	39.7	37.736	39.912
		3	36.156	45.184	41.124	37.38	38.46	41.736
		4	36.928	45.604	43.704	39.8	36.704	39.832
		5	35.538	44.54	41.864	38.316	36.104	39.974
		AVE	35.5156	44.4624	42.5744	39.1928	36.9088	39.8444
		SD	1.48876	1.08719	1.07893	1.19685	1.06337	1.25786
	6	Repetitions	CK	S	S+MT50	S+MT100	S+MT200	S+MT500
		1	37.572	44.056	46.668	44.668	39.476	41.348
		2	37.672	49.02	44.604	40.088	37.896	42.7
		3	37.672	48.184	45.216	42.768	37.896	44.572
		4	34.22	47.854	44.216	42.284	39.476	44.572
		5	36.704	47.329	46.024	43.173	39.864	44.056
		AVE	36.768	47.2886	45.3456	42.5962	38.9216	43.4496
		SD	1.32493	1.70707	0.900192	1.48614	0.849299	1.25427
	9	Repetitions	CK	S	S+MT50	S+MT100	S+MT200	S+MT500
		1	40.24	49.12	45.66	46.184	40.184	44.28
		2	35.38	52.732	49.152	45.604	43.6	47.456
		3	38.128	52.216	49.22	45.056	44.12	46.344
		4	38.476	53.248	52.376	48.184	39.6	45.924
		5	39.572	54.296	49.291	43.024	41.593	47.508
		AVE	38.3592	52.3224	49.1398	45.6104	41.8194	46.3024
		SD	1.67039	1.74277	2.12657	1.67029	1.79526	1.18484
	12	Repetitions	CK	S	S+MT50	S+MT100	S+MT200	S+MT500
		1	40.312	57.988	49.28	51.536	41.476	51.02
		2	34.636	54.052	54.732	46.82	45.896	48.14
		3	42.376	51.988	51.312	48.536	44.284	49.468
		4	38.248	55.791	54.692	50.764	43.126	48.052
		5	39.796	54.754	51.86	46.765	44.986	50.383
		AVE	39.0736	54.9146	52.3752	48.8842	43.9536	49.4126
		SD	2.58206	1.97731	2.09276	1.97174	1.53436	1.18315
	Explanation：This figure is the raw data of MDA determination. We set up five repetitions in each experiment to ensure the reliability of the results, and finally take the average as the final result.

## Sheet: SOD
	days after treatment /d		different concentration of melatonin
	0	Repetitions	CK	S	S+MT50	S+MT100	S+MT200	S+MT500
		1	356.325	358.85	366.261	357.188	352.826	353.129
		2	348.242	340.842	349.128	369.724	365.182	342.188
		3	359.325	365.485	359.942	341.485	345.485	367.188
		AVE	354.631	355.059	358.444	356.132	354.498	354.169
		SD	4.68061	10.4113	7.07452	11.5529	8.12801	10.2326
	3	Repetitions	CK	S	S+MT50	S+MT100	S+MT200	S+MT500
		1	342.123	493.997	529.229	521.692	567.603	552.575
		2	332.973	501.761	538.157	553.997	557.603	558.761
		3	354.269	513.659	517.364	542.077	563.659	536.36
		AVE	343.122	503.139	528.25	539.256	562.955	549.232
		SD	8.72274	8.08581	8.51682	13.3386	4.11271	9.44586
	6	Repetitions	CK	S	S+MT50	S+MT100	S+MT200	S+MT500
		1	346.544	483.064	497.195	520.58	550.782	546.464
		2	360.007	467.583	514.606	547.047	543.273	541.619
		3	339.835	485.736	516.566	537.495	556.42	532.051
		AVE	348.795	478.794	509.455	535.041	550.158	540.045
		SD	8.38745	8.00254	8.70629	10.9435	5.38533	5.98835
	9	Repetitions	CK	S	S+MT50	S+MT100	S+MT200	S+MT500
		1	364.334	462.136	475.586	514.673	527.004	514.463
		2	371.514	447.829	478.617	506.791	523.463	507.494
		3	354.334	464.317	496.776	498.617	518.496	513.126
		AVE	363.394	458.094	483.659	506.694	522.988	511.695
		SD	7.04543	7.31296	9.3569	6.55547	3.48962	3.01988
	12	Repetitions	CK	S	S+MT50	S+MT100	S+MT200	S+MT500
		1	367.325	415.485	442.026	467.188	502.826	487.188
		2	351.242	435.485	446.261	479.724	485.485	473.188
		3	357.325	420.842	459.128	475.485	485.182	488.393
		AVE	358.631	423.937	449.138	474.132	491.164	482.923
		SD	6.6305	8.45318	7.27193	5.20626	8.24675	6.90119
	Explanation：This figure is the raw data of SOD activity determination. We set up three repetitions in each experiment to ensure the reliability of the results, and finally take the average as the final result.

## Sheet: POD
	days after treatment /d		different concentration of melatonin
	0	Repetitions	CK	S	S+MT50	S+MT100	S+MT200	S+MT500
		1	68.9	72.5	73.6	65.9	65.3	74.6
		2	75.4	76.1	73.6	73.6	74.2	71
		3	61.4	59.4	65.4	72.3	69.8	67.3
		AVE	68.5667	69.3333	70.8667	70.6	69.7667	70.9667
		SD	5.72033	7.17604	3.86552	3.36551	3.63349	2.98031
	3	Repetitions	CK	S	S+MT50	S+MT100	S+MT200	S+MT500
		1	64	119.6	148	166	157.6	157.2
		2	57.2	144.8	152.8	157.2	169.2	148.8
		3	76.8	138	133.2	147.2	165.2	162.4
		AVE	66	134.133	144.667	156.8	164	156.133
		SD	8.12568	10.645	8.3416	7.68028	4.8111	5.60317
	6	Repetitions	CK	S	S+MT50	S+MT100	S+MT200	S+MT500
		1	56.8	98.3	119.2	128.8	144	122.4
		2	65.2	97.6	101.2	131.2	128.4	134
		3	66	108.6	113.6	114.6	150.8	145.6
		AVE	62.6667	101.5	111.333	124.867	141.067	134
		SD	4.1612	5.02858	7.52123	7.32545	9.37704	9.47136
	9	Repetitions	CK	S	S+MT50	S+MT100	S+MT200	S+MT500
		1	77.6	69.6	83.8	119.8	119.6	103.2
		2	57.6	69.8	88.8	104.4	110.4	112.4
		3	59.2	76.8	80.8	100.1	129.6	114.4
		AVE	64.8	72.0667	84.4667	108.1	119.867	110
		SD	9.07451	3.34797	3.29983	8.45734	7.84063	4.87716
	12	Repetitions	CK	S	S+MT50	S+MT100	S+MT200	S+MT500
		1	59.6	65.4	72.8	84.4	99.8	88.4
		2	72.8	70.2	72.8	96.6	105.4	99.6
		3	53.8	70.4	85.8	79.2	96.4	83.8
		AVE	62.0667	68.6667	77.1333	86.7333	100.533	90.6
		SD	7.9504	2.31132	6.12826	7.29261	3.71065	6.63526
	Explanation：This figure is the raw data of POD activity determination. We set up three repetitions in each experiment to ensure the reliability of the results, and finally take the average as the final result.

## Sheet: CAT
	days after treatment /d		different concentration of melatonin
	0	Repetitions	CK	S	S+MT50	S+MT100	S+MT200	S+MT500
		1	431.65	413.52	421.45	413.52	423.46	413.58
		2	416.84	438.24	427.84	437.84	428.25	440.69
		3	432.54	421.46	422.94	431.46	419.14	421.45
		AVE	427.01	424.407	424.077	427.607	423.617	425.24
		SD	7.20045	10.3047	2.72972	10.2957	3.72079	11.3875
	3	Repetitions	CK	S	S+MT50	S+MT100	S+MT200	S+MT500
		1	422.28	530.16	559.82	581.96	613.6	586.72
		2	412.12	543.76	549.94	570.32	589.48	573.44
		3	422.28	531.96	564.74	569.5	587.7	576.72
		AVE	418.893	535.293	558.167	573.927	596.927	578.96
		SD	4.78947	6.03177	6.15414	5.69028	11.8122	5.64817
	6	Repetitions	CK	S	S+MT50	S+MT100	S+MT200	S+MT500
		1	413.1	522.44	540.8	539.68	561.62	542.48
		2	431.46	490.64	535.06	555.22	587.52	569.16
		3	431.46	516.54	523.26	564.14	579.57	543.85
		AVE	425.34	509.873	533.04	553.013	576.237	551.83
		SD	8.65499	13.8117	7.30174	10.1069	10.8332	12.2669
	9	Repetitions	CK	S	S+MT50	S+MT100	S+MT200	S+MT500
		1	413.1	497.36	507.36	546.7	569.16	544.56
		2	459	484.9	519.82	538.66	547.52	523.92
		3	431.46	507.36	526.54	528.34	549.16	527.36
		AVE	434.52	496.54	517.907	537.9	555.28	531.947
		SD	18.8631	9.18757	7.94622	7.51468	9.83745	9.02886
	12	Repetitions	CK	S	S+MT50	S+MT100	S+MT200	S+MT500
		1	426.6	474.9	514.24	512.6	553.58	537.84
		2	413.08	472.44	505.88	532.6	551.78	526.7
		3	403.94	491.98	499.98	532.7	541.62	534.4
		AVE	414.54	479.773	506.7	525.967	548.993	532.98
		SD	9.30833	8.68965	5.85042	9.45175	5.26527	4.65741
	Explanation：This figure is the raw data of CAT activity determination. We set up three repetitions in each experiment to ensure the reliability of the results, and finally take the average as the final result.

## Sheet: APX
	days after treatment /d		different concentration of melatonin
	0	Repetitions	CK	S	S+MT50	S+MT100	S+MT200	S+MT500
		1	113.85	109.35	124.84	120.45	118.45	124.65
		2	129.45	110.3	110.84	119.45	102.34	119.46
		3	123.93	120.23	103.56	114.96	121.35	102.34
		4	110.92	119.45	129.56	130.23	126.34	126.92
		5	112.92	118.34	119.93	112.34	121.94	123.92
		AVE	118.214	115.534	117.746	119.486	118.084	119.458
		SD	7.19991	4.70952	9.41914	6.13048	8.26686	8.89465
	3	Repetitions	CK	S	S+MT50	S+MT100	S+MT200	S+MT500
		1	120.98	276.09	280.69	289.83	300.98	276.98
		2	115.67	270.34	269.24	299.03	319.01	287.59
		3	110.34	270.39	269.84	289.03	299.85	298.57
		4	123.94	268.93	279.73	282.56	299.95	289.75
		5	128.67	268.83	298.79	299.94	308.93	299.86
		AVE	119.92	270.916	279.658	292.078	305.744	290.55
		SD	6.38256	2.67112	10.6961	6.55862	7.44503	8.30112
	6	Repetitions	CK	S	S+MT50	S+MT100	S+MT200	S+MT500
		1	130.02	259.95	247.45	258.93	268.93	246.64
		2	123.03	248.2	268.83	276.93	286.35	268.22
		3	110.01	240.57	265.56	268.93	275.8	254.44
		4	109.24	252.85	247.93	248.93	280.72	269.83
		5	131.04	230.38	253.79	276.93	285.84	270.24
		AVE	120.668	246.39	256.712	266.13	279.528	261.874
		SD	9.43196	10.189	8.90594	10.8517	6.54244	9.60103
	9	Repetitions	CK	S	S+MT50	S+MT100	S+MT200	S+MT500
		1	129.37	199.87	200.98	223.95	246.34	210.83
		2	120.93	210.92	219.78	210.94	236.75	230.97
		3	109.88	192.49	198.04	204.98	219.75	224.71
		4	119.29	200.93	211.78	224.85	229.74	209.34
		5	120.93	199.83	213.84	238.74	236.94	219.74
		AVE	120.08	200.808	208.884	220.692	233.904	219.118
		SD	6.20344	5.88715	8.14539	11.7949	8.82775	8.20277
	12	Repetitions	CK	S	S+MT50	S+MT100	S+MT200	S+MT500
		1	130.01	154.85	159.75	176.94	190.31	175.75
		2	118.03	176.93	174.84	190.45	210.93	190.24
		3	126.84	186.34	180.81	180.35	203.57	183.28
		4	119.28	154.49	193.56	194.39	206.36	174.67
		5	120.04	169.36	177.35	199.57	201.24	194.13
		AVE	122.84	168.394	177.262	188.34	202.482	183.614
		SD	4.71293	12.4307	10.8697	8.49668	6.889	7.69986
	Explanation：This figure is the raw data of APX activity determination. We set up five repetitions in each experiment to ensure the reliability of the results, and finally take the average as the final result.

[truncated: 4 more sheets: AsA, GSH, soluble sugar, soluble protein]
